# Supplementary material for: Thermal stabilization of enterovirus A 71 and production of antigenically stabilized empty capsids
Source: PubMed Central journal article supplement (PMC10019091; doi:10.1099/jgv.0.001771), 2022-08-23
Supplement: jgv-103-1771-s001.pdf [file jgv-103-1771-s001.pdf]

**Table S1:** NGS summary data, non-coding, and synonymous changes relative to the published sequence MG432108.1

| CDS   | Minimum | Change | CDS Codon | Amino Acid | Average Variant Frequency |        |        |        |        |
|-------|---------|--------|-----------|------------|---------------------------|--------|--------|--------|--------|
|       |         |        |           |            | p4                        | p5     | p7     | p8     | p9     |
|       | 147     | A -> G |           |            |                           | 2.4%   |        |        |        |
|       | 583     | A -> G |           |            | 8.7%                      | 5.4%   |        |        |        |
|       | 600     | A -> G |           |            | 3.3%                      |        |        |        |        |
|       | 690     | C -> A |           |            |                           |        | 2.8%   | 3.1%   | 1.85%  |
|       | 723     | G -> A |           |            | 99.7%                     | 100.0% | 100.0% | 99.9%  | 99.90% |
|       | 729     | A -> G |           |            |                           |        |        |        | 1.40%  |
|       | 731     | T -> C |           |            | 100.0%                    | 100.0% | 100.0% | 99.9%  | 99.90% |
| VP4   | 828     | T -> C | 27        |            | 99.7%                     | 99.8%  | 99.9%  | 99.9%  | 99.90% |
| VP2   | 1047    | C -> T | 31        |            |                           |        |        |        | 1.35%  |
|       | 1248    | T -> C | 98        |            | 6.0%                      | 12.9%  |        |        |        |
|       | 1491    | C -> T | 179       |            |                           |        |        |        | 1.25%  |
|       | 1518    | C -> T | 188       |            |                           |        | 5.2%   | 4.5%   | 2.25%  |
|       | 1662    | C -> T | 236       |            | 2.4%                      | 6.6%   |        |        |        |
| VP1   | 2694    | C -> T | 84        |            |                           |        |        |        | 1.10%  |
|       | 2724    | T -> C | 94        |            | 4.4%                      | 3.1%   |        |        |        |
|       | 3012    | C -> T | 190       |            | 94.9%                     | 96.6%  | 99.9%  | 99.7%  | 99.70% |
| 2A    | 3354    | T -> C | 7         |            |                           | 4.7%   |        |        |        |
|       | 3444    | T -> C | 37        |            |                           | 5.7%   | 2.7%   |        | 1.20%  |
|       | 3663    | C -> T | 110       |            | 41.7%                     | 60.1%  | 99.9%  | 99.7%  | 99.55% |
| 2B    | 3933    | T -> C | 50        |            |                           |        |        |        | 2.15%  |
|       | 4032    | T -> C | 83        |            | 42.5%                     | 60.2%  | 99.7%  | 99.5%  | 99.55% |
| 2C    | 4134    | A -> G | 18        |            |                           |        |        |        | 1.40%  |
|       | 4359    | A -> G | 93        |            | 100.0%                    | 100.0% | 99.8%  | 100.0% | 99.95% |
|       | 4962    | C -> T | 294       |            | 44.4%                     | 62.9%  | 99.9%  | 99.7%  | 99.70% |
| 3C    | 5586    | G -> A | 65        |            | 3.9%                      | 2.7%   |        |        |        |
|       | 5610    | A -> G | 73        |            |                           | 3.0%   |        |        |        |
| 3D    | 6429    | G -> A | 163       |            | 2.9%                      |        |        |        |        |
| 3'UTR | 7341    | A -> T |           |            | 95.6%                     | 95.4%  | 100.0% | 99.7%  | 99.50% |

**Table S2:** NGS summary data, non-synonymous changes relative to the published sequence MG432108.1

| CDS | Minimum | Change | CDS Codon | Amino Acid | Average Variant Frequency |        |        |        |        |
|-----|---------|--------|-----------|------------|---------------------------|--------|--------|--------|--------|
|     |         |        |           |            | p4                        | p5     | p7     | p8     | p9     |
| VP2 | 1207    | G -> C | 85        | V -> L     | 24.3%                     | 14.5%  | 9.2%   | 20.6%  | 43.10% |
| VP3 | 2396    | A -> G | 225       | N -> D     | 21.4%                     | 53.4%  |        |        |        |
|     | 2421    | A -> G | 233       | I -> M     | 95.5%                     | 97.2%  | 100.0% | 99.6%  | 99.70% |
| VP1 | 2597    | T -> C | 52        | I -> T     | 3.8%                      | 3.1%   |        |        | 1.70%  |
|     | 2789    | A -> G | 116       | Y -> C     | 2.3%                      | 2.3%   | 22.8%  | 43.5%  | 69.15% |
|     | 2876    | A -> T | 145       | Q -> L     | 5.2%                      | 3.2%   |        |        |        |
|     | 2927    | A -> T | 162       | K -> I     | 15.6%                     | 21.2%  | 99.6%  | 99.9%  | 99.90% |
|     | 3178    | C -> G | 246       | P -> A     | 95.2%                     | 97.2%  | 100.0% | 99.7%  | 99.70% |
| 3A  | 5101    | T -> C | 12        | F -> L     | 100.0%                    | 100.0% | 99.9%  | 100.0% | 99.95% |
|     | 5263    | G -> A | 66        | A -> T     | 95.5%                     | 97.0%  | 99.9%  | 99.7%  | 99.60% |
| 3C  | 5860    | A -> G | 157       | I -> V     |                           |        | 2.4%   | 4.4%   | 6.45%  |
